# Supplementary material for: A label free exonuclease III-aided fluorescence assay for adenosine triphosphate based on graphene oxide and ligation reaction
Source: Royal Society of Chemistry journal article supplement (doi:10.1039/c2nj41055a), 2013-01-01
Supplement: c2nj41055a.pdf [file c2nj41055a.pdf]

**Electronic Supplementary Information:**

**A label free exonuclease III-aided fluorescence assay for adenosine triphosphate based on graphene oxide and ligation reaction**

Wenping Zhu, Ziwei Zhao, Zhen Li, Hong Li, Jianhui Jiang\*, Guoli Shen, Ruqin Yu\*

*State Key Laboratory of Chemo/Bio-Sensing and Chemometrics, College of Chemistry and Chemical Engineering, Hunan University, Changsha, 410082, P. R. China*

To whom correspondence should be addressed.

Tel: +86 731 88822577.

Fax: +86 731 88822577.

E-mail address: rquy@hnu.edu.cn (R.-Q. Yu) jianhuijiang@hnu.edu.cn (J.-H.Jiang)

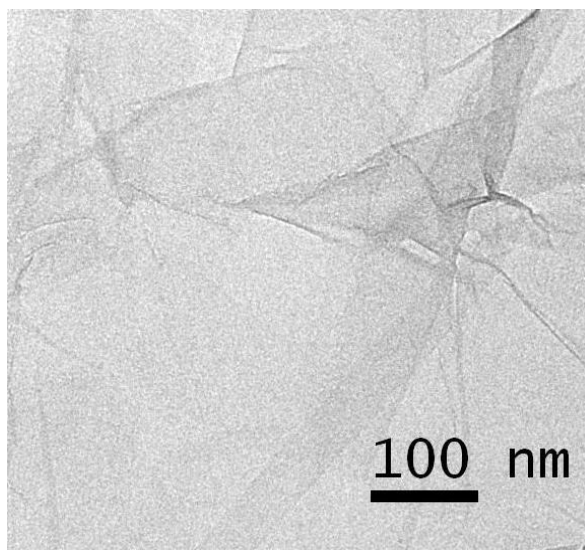

**Fig. S1** HRTEM image of GO obtained on a field-emission high-resolution 2100F TEM (JEOL, Japan).
